# Supplementary material
Source: publisher site journal article supplement (http://kjim.org/upload/media/kjim-2023-206-Supplementary-5.pdf)
Supplement: Supplementary file 1 [file kjim-2023-206-Supplementary-5.pdf]

## **5. Conflict of interests (appendix)**
